# Supplementary material
Source: PubMed Central journal article supplement (PMC4917464)
Supplement: NIHMS768848-supplement-Supp_Info.pdf [file NIHMS768848-supplement-Supp_Info.pdf]

## Supplementary appendix

### Supplement to: **Development and Validation of a Disease Specific Questionnaire to Assess Symptoms in Polycystic Liver Disease**

Myrte K. Neijenhuis<sup>1</sup>, Tom J.G. Gevers<sup>1</sup>, Marie C. Hogan<sup>2</sup>, Patrick S. Kamath<sup>3</sup>, Titus F.M. Wijnands<sup>1</sup>, Ralf C.P.M van den Ouweland<sup>1</sup>, Marie E. Edwards<sup>2</sup>, Jeff A. Sloan<sup>4</sup>, Wietske Kievit<sup>5</sup>, Joost P.H. Drenth<sup>1</sup>

<sup>1</sup>Department of Gastroenterology and Hepatology, Radboud University Nijmegen Medical Center, Nijmegen, the Netherlands

<sup>2</sup>Division of Nephrology and Hypertension, Department of Internal Medicine, Mayo Clinic, Rochester (MN), US

<sup>3</sup>Division of Gastroenterology and Hepatology, Mayo Clinic, Rochester (MN), US

<sup>4</sup>Quality of Life Group, Department of Health Sciences Research, Mayo Clinic, Rochester (MN), US

<sup>5</sup>Radboud Institute for Health Sciences, Radboud University Nijmegen Medical Center, Nijmegen, the Netherlands

### Content of supplementary appendix:

|                                                                                                                 |    |
|-----------------------------------------------------------------------------------------------------------------|----|
| Table S1. Characteristics of included patients and clinicians in the development phases of the PLD-Q .....      | 2  |
| Table S2. Results of the Delphi Survey.....                                                                     | 3  |
| Table S3. Changes PLD-Q pilot version after cognitive debriefings and patient and clinicians focus groups ..... | 5  |
| Table S4. Result factor analysis.....                                                                           | 6  |
| Supplementary Figure S1: Flowchart Delphi survey for item selection.....                                        | 7  |
| Supplementary Figure S2. Score distributions of the Dutch PLD-Q and the pilot version of the English PLD-Q..... | 8  |
| Supplementary File 1. Methods and results Delphi survey for item selection of the PLD-Q .....                   | 9  |
| Supplementary File 2. Results of the pilot version of the English PLD-Q in a US cohort.....                     | 10 |
| Supplementary File 3. Final version of the PLD-Q .....                                                          | 11 |

## Supplementary tables

**Table S1. Characteristics of included patients and clinicians in the development phases of the PLD-Q**

|                                            | Dutch patients (n=19) | US patients cognitive interviews (n=9) | US patients focus group (n=6) |
|--------------------------------------------|-----------------------|----------------------------------------|-------------------------------|
| <b>Female, n (%)</b>                       | 18 (94)               | 9 (100)                                | 6 (100)                       |
| <b>Age (years) ± SD</b>                    | 53 ± 7                | 56 ± 6                                 | 47 ± 6                        |
| <b>ADPLD/ADPKD, n (%)</b>                  | 11/8 (58/42)          | 3/9 (33/67)                            | 0/6                           |
| <b>Liver volume, mL (IQR)</b>              | 3884 (2713-5967)      | 2055 (1478 - 3441)                     | 2432 (1671 - 3659)            |
| <b>Kidney volume, mL (IQR)<sup>a</sup></b> | 318 (274 - 393)       | 535 (374 - 820)                        | 358 (242 - 805)               |

Data is presented as mean ± standard deviation for normally distributed variables and median (interquartile range) for non-normally distributed variables. Organ volumes are height corrected. <sup>a</sup>Kidney volumes are measured in ADPKD patients only. Abbreviations: ADPLD, isolated autosomal dominant polycystic liver disease; ADPKD, autosomal dominant polycystic kidney disease.

**Table S2. Results of the Delphi Survey**

| Item                          | Round 1 respondents 11/15 (73%) |      |      |        |              |                        | Round 2: respondents 10/11 (91%) |      |      |        |              |                        |
|-------------------------------|---------------------------------|------|------|--------|--------------|------------------------|----------------------------------|------|------|--------|--------------|------------------------|
|                               | 1-3                             | 4-6  | 7-9  | Rating | Impact level | Consensus              | 1-3                              | 4-6  | 7-9  | Rating | Impact level | Consensus              |
| Feeling full                  | 0                               | 0    | 100  | 7      | High         | Unanimous <sup>b</sup> |                                  |      |      |        |              |                        |
| Bloating                      | 0                               | 0    | 100  | 8      | High         | Unanimous <sup>b</sup> |                                  |      |      |        |              |                        |
| Abdominal tightness           | 0                               | 0    | 100  | 8      | High         | Unanimous <sup>b</sup> |                                  |      |      |        |              |                        |
| Lack of appetite              | 18,2                            | 18,2 | 63,6 | 7      | High         | Weak                   |                                  |      | 100  | 8      | High         | Unanimous <sup>b</sup> |
| Early satiety                 | 0                               | 0    | 100  | 8      | High         | Unanimous <sup>b</sup> |                                  |      |      |        |              |                        |
| Borborygmi                    | 63,6                            | 27,3 | 9,1  | 3      | Low          | Weak                   | 100                              |      |      | 1,5    | Low          | Unanimous <sup>a</sup> |
| Acid reflux                   | 36,4                            | 36,4 | 27,3 | 5      | Moderate     | None                   | 40                               | 30   | 30   | 4,5    | Moderate     | None <sup>a</sup>      |
| Regurgitation                 | 45,5                            | 36,4 | 18,2 | 5      | Moderate     | None                   | 60                               | 30   | 10   | 3      | Low          | Weak <sup>a</sup>      |
| Nausea                        | 18,2                            | 54,5 | 27,3 | 3      | Low          | None                   | 10                               | 60   | 30   | 6      | Moderate     | Weak <sup>a</sup>      |
| Vomiting                      | 63,6                            | 27,3 | 9,1  | 3      | Low          | Weak                   | 50                               | 20   | 30   | 3,5    | Moderate     | None <sup>a</sup>      |
| Obstipation                   | 72,7                            | 27,3 | 0    | 7      | High         | Moderate               | 90                               | 10   | 0    | 1      | Low          | Strong <sup>a</sup>    |
| Abdominal pain                | 0                               | 27,3 | 72,7 | 6      | Moderate     | Moderate               |                                  |      | 100  | 8      | High         | Unanimous <sup>b</sup> |
| Backpain                      | 18,2                            | 54,4 | 27,3 | 8      | High         | None                   | 0                                | 44,4 | 55,6 | 6      | Moderate     | None <sup>a</sup>      |
| Pain or pressure rib cage     | 9,1                             | 18,2 | 72,7 | 7      | High         | Moderate               | 0                                | 0    | 100  | 8      | High         | Unanimous <sup>b</sup> |
| Pain in side                  | 9,1                             | 27,3 | 63,6 | 5      | Moderate     | Weak                   | 0                                | 10   | 90   | 7,5    | High         | Strong <sup>b</sup>    |
| Referred shoulder pain        | 45,5                            | 36,4 | 18,2 | 3      | Low          | None                   | 40                               | 40   | 20   | 4,5    | Moderate     | None <sup>a</sup>      |
| Pain in groin                 | 72,7                            | 27,3 | 0    | 3      | Low          | Moderate               | 90                               | 10   | 0    | 1      | Low          | Strong <sup>a</sup>    |
| Pain in legs                  | 81,8                            | 18,2 | 0    | 2      | Low          | Strong <sup>a</sup>    |                                  |      |      |        |              |                        |
| Headache                      | 81,8                            | 18,2 | 0    | 1      | Low          | Strong <sup>a</sup>    |                                  |      |      |        |              |                        |
| Pain during intercourse       | 45,5                            | 45,5 | 9,1  | 4      | Moderate     | None                   | 20                               | 60   | 20   | 5      | Moderate     | Weak <sup>a</sup>      |
| Discomfort during intercourse | 27,3                            | 27,3 | 45,5 | 6      | Moderate     | None                   | 10                               | 20   | 70   | 7      | High         | Moderate <sup>b</sup>  |
| Easy bruisability             | 81,8                            | 18,2 | 0    | 2      | Low          | Strong <sup>a</sup>    |                                  |      |      |        |              |                        |
| Muscle cramps                 | 63,6                            | 36,4 | 0    | 1      | Low          | Weak                   | 80                               | 20   | 0    | 1      | Low          | Strong <sup>a</sup>    |
| Limited mobility              | 9,1                             | 45,5 | 45,5 | 6      | Moderate     | None                   | 0                                | 25   | 75   | 7      | High         | Moderate <sup>b</sup>  |

|                                 |      |      |      |   |          |          |      |      |      |     |          |                       |
|---------------------------------|------|------|------|---|----------|----------|------|------|------|-----|----------|-----------------------|
| Leg edema                       | 36,4 | 45,5 | 18,2 | 6 | Moderate | None     | 40   | 50   | 10   | 4,5 | Moderate | None <sup>a</sup>     |
| Dyspnea                         | 9,1  | 63,6 | 27,3 | 7 | High     | Weak     | 0    | 30   | 70   | 5   | Moderate | Moderate <sup>a</sup> |
| Dyspnea after physical exertion | 9,1  | 18,2 | 72,7 | 5 | Moderate | Moderate | 0    | 30   | 70   | 7   | High     | Moderate <sup>b</sup> |
| Frequent micturition            | 18,2 | 63,6 | 18,2 | 2 | Low      | Weak     | 30   | 60   | 10   | 4,5 | Moderate | Weak <sup>a</sup>     |
| Itch                            | 72,7 | 18,2 | 9,1  | 5 | Moderate | Moderate | 70   | 30   | 0    | 1,5 | Low      | Moderate <sup>a</sup> |
| Sleep disorders                 | 9,1  | 63,6 | 27,3 | 3 | Low      | Weak     | 10   | 50   | 40   | 6   | Moderate | None <sup>a</sup>     |
| Dizziness                       | 54,5 | 45,5 | 0    | 6 | Moderate | None     | 77,8 | 11,1 | 11,1 | 1,5 | Low      | Moderate <sup>a</sup> |
| Tiredness                       | 18,2 | 36,4 | 45,5 | 3 | Low      | None     | 0    | 20   | 80   | 7   | High     | Strong <sup>b</sup>   |
| Concentration problems          | 63,6 | 36,4 | 0    | 5 | Moderate | Weak     | 60   | 40   | 0    | 2   | Low      | Weak <sup>a</sup>     |
| Depression                      | 36,4 | 27,3 | 36,4 | 5 | Moderate | None     | 30   | 30   | 40   | 5   | Moderate | None <sup>a</sup>     |
| Anxiety about the future        | 18,2 | 27,3 | 54,5 | 7 | High     | None     | 10   | 20   | 70   | 7   | High     | Moderate <sup>b</sup> |
| Dissatisfaction size abdomen    | 9,1  | 36,4 | 54,5 | 7 | High     | None     | 0    | 20   | 80   | 7   | High     | Strong <sup>b</sup>   |

Rating is given as the median score. Items were selected if rated as relevant (rating score 7-9) and consensus was reached (80-100 % agreement). <sup>a</sup>Rejected items, <sup>b</sup>Selected items for the PLD-Q.

**Table S3. Changes PLD-Q pilot version after cognitive debriefings and patient and clinicians focus groups**

| <b>Item</b>                    | <b>Pilot version PLD-Q</b>                                                                                   | <b>Improved PLD-Q</b>                                                                         | <b>Comment</b>                                                                                                                           |
|--------------------------------|--------------------------------------------------------------------------------------------------------------|-----------------------------------------------------------------------------------------------|------------------------------------------------------------------------------------------------------------------------------------------|
| <b>Fullness</b>                | How often did you feel full?                                                                                 | How often did you experience fullness in your abdomen related to your polycystic liver?       | Added 'related to your polycystic liver' to distinguish between fullness after a meal and fullness because of a polycystic liver         |
| <b>Early satiety</b>           | How often were you quickly satiated, or did you eat a smaller portion as a result of being quickly satiated? | How often have you felt full up too quickly after beginning to eat?                           | Not all patients understood the word satiated.                                                                                           |
| <b>Acid reflux</b>             | -                                                                                                            | How often did you have acid reflux?                                                           | Patients and clinicians agreed item was missing                                                                                          |
| <b>Abdominal pain</b>          | How often did you have stomach pain?                                                                         | How often did you have abdominal pain?                                                        | Stomach pain was considered as only the region of the stomach by patients and clinicians, not the whole abdomen.                         |
| <b>Back pain</b>               | -                                                                                                            | How often did you have back pain?                                                             | Patients and clinicians agreed item was missing                                                                                          |
| <b>Shortness of breath</b>     | How often were you short of breath after physical exertion?                                                  | How often were you short of breath after physical exertion (for example climbing the stairs)? | Added example to improve understanding                                                                                                   |
| <b>Concern of liver growth</b> | -                                                                                                            | How often were you concerned that your abdomen is getting larger?                             | Patients and clinicians agreed item was missing                                                                                          |
| <b>Discomfort intercourse</b>  | 'No sexual intercourse' option                                                                               | -                                                                                             | Removed 'no sexual intercourse' option as it leads to confusion and problems with data analysis                                          |
| <b>Discomfort intercourse</b>  | How often did you have a problem with intercourse?                                                           | How often did your polycystic liver disease cause you to have a problem with intercourse?     | In old question patients were unable to address their problem. Some patients did not have intercourse because of their polycystic liver. |

**Table S4. Result factor analysis**

| Item                                | Dutch cohort |          |          | US cohort |          |
|-------------------------------------|--------------|----------|----------|-----------|----------|
|                                     | Factor 1     | Factor 2 | Factor 3 | Factor 1  | Factor 2 |
| Q1. Feeling full                    | 0.793        | 0.331    | 0.140    | 0.803     | 0.172    |
| Q2. Lack of appetite                | 0.755        | 0.425    | -0.034   | 0.775     | -0.264   |
| Q3. Early satiety                   | 0.763        | 0.330    | 0.049    | 0.796     | 0.065    |
| Q4. Acid Reflux                     | N/A          | N/A      | N/A      | 0.530     | -0.054   |
| Q5. Nausea                          | 0.432        | 0.581    | -0.026   | 0.762     | -0.269   |
| Q6. Pressure or pain rib cage       | 0.755        | 0.030    | -0.099   | 0.763     | -0.249   |
| Q7. Pain in side                    | 0.665        | -0.028   | -0.456   | 0.741     | -0.373   |
| Q8. Abdominal pain                  | 0.651        | 0.298    | 0.274    | 0.771     | -0.373   |
| Q9. Back pain                       | N/A          | N/A      | N/A      | 0.618     | -0.024   |
| Q10. Shortness of breath            | 0.675        | -0.305   | -0.319   | 0.725     | 0.040    |
| Q11. Limited mobility               | 0.820        | -0.350   | -0.151   | 0.771     | 0.016    |
| Q12. Tiredness                      | 0.665        | -0.226   | -0.369   | 0.782     | 0.011    |
| Q13. Anxiety about the future       | 0.532        | -0.371   | 0.438    | 0.651     | 0.316    |
| Q14. Concern abdomen getting larger | N/A          | N/A      | N/A      | 0.769     | 0.433    |
| Q15. Dissatisfaction size abdomen   | 0.702        | -0.230   | 0.429    | 0.759     | 0.479    |
| Q16. Intercourse discomfort         | 0.636        | -0.443   | 0.217    | 0.635     | 0.104    |
| Eigenvalues                         | 6.154        | 1.480    | 1.000    | 8.572     | 1.048    |
| % of variance                       | 47           | 11       | 8        | 54        | 7        |

To determine a factor, the eigenvalue has to exceed 1. The factor analysis shows that the variability is largely explained by the first factor, suggesting unidimensionality of the questionnaire. N/A; not applicable.

## Supplementary figures

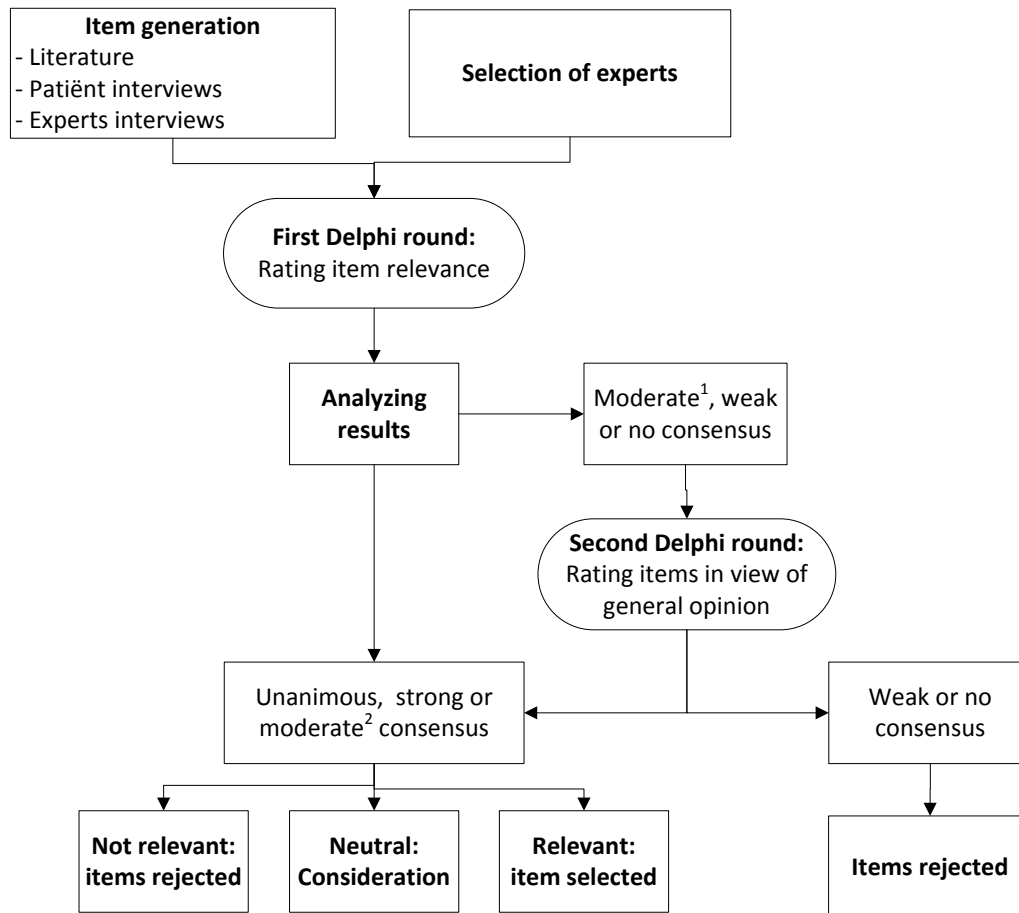

### Supplementary Figure S1: Flowchart Delphi survey for item selection

Consensus rated as percentage of experts which rated in one of the three ranges (1-3, 4-6 or 7-9\*) of the questionnaire; Unanimous: 100%, Strong consensus: <100% and  $\geq 80\%$ , Moderate  $\leq 80$  and  $\geq 70$ , Weak consensus  $\leq 70$  and  $\geq 60$ , No consensus <60%. Range 1-3 is considered as not relevant, 4-6 as neutral and 7-9 as relevant. Moderate<sup>1</sup>; after first Delphi round, moderate<sup>2</sup>; after second Delphi round

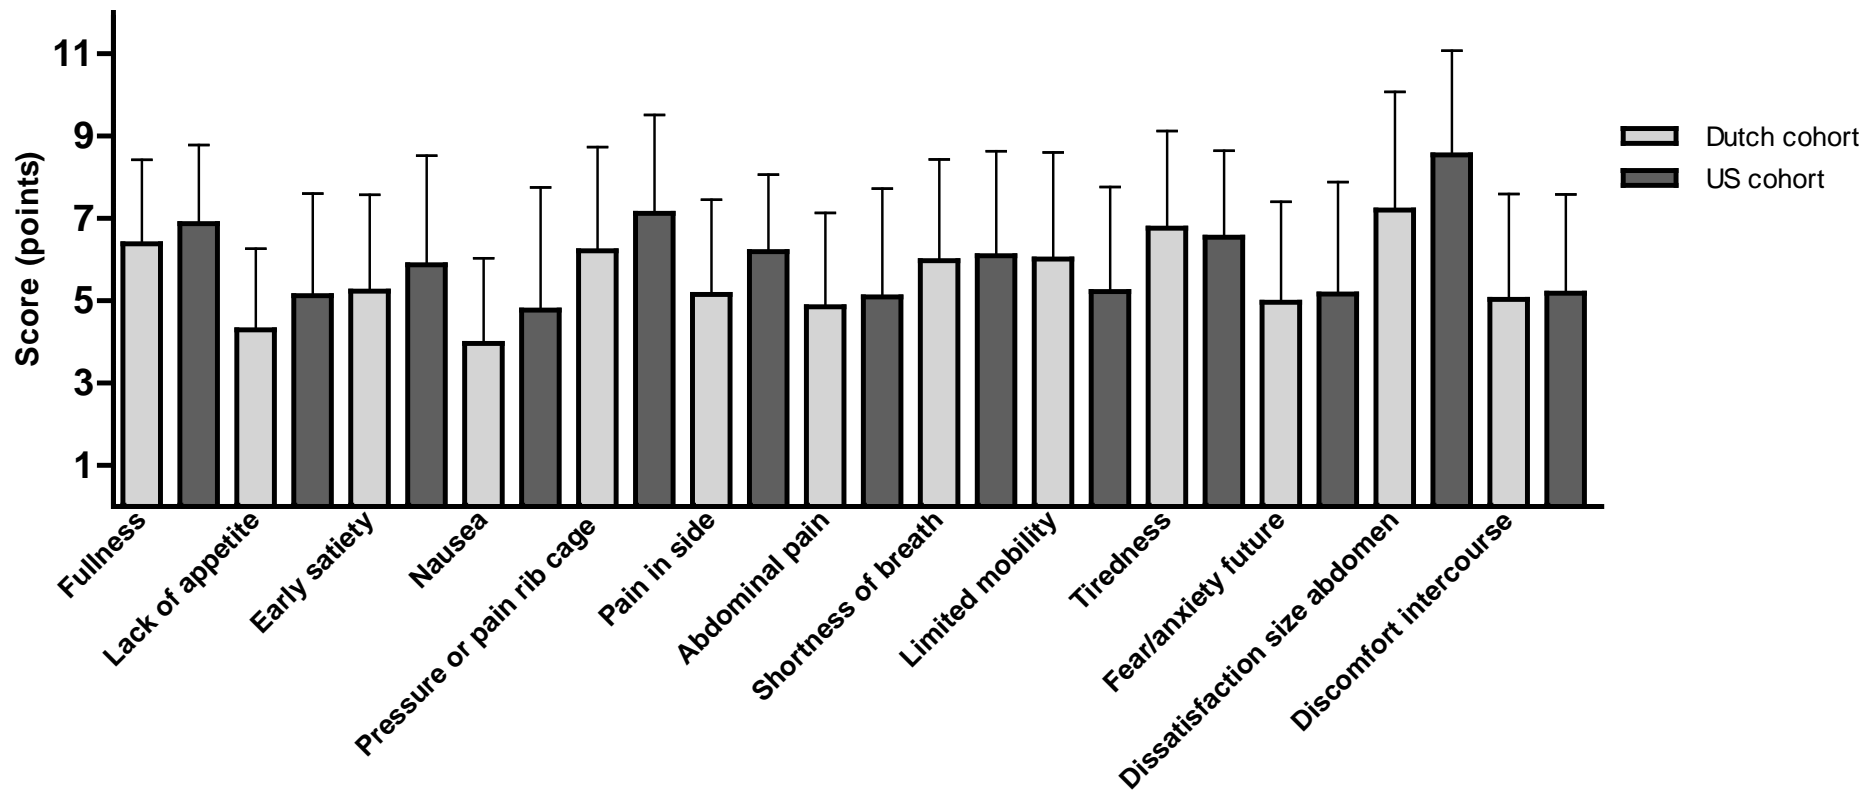

**Supplementary Figure S2.** Score distributions of the Dutch PLD-Q and the pilot version of the English PLD-Q.



## Supplementary Files

### Supplementary File 1. Methods and results Delphi survey for item selection of the PLD-Q

#### *1a) Conducting the Delphi survey for item selection*

The Delphi survey consisted of a two-round survey in a panel of 15 clinicians using a web-based questionnaire. The questionnaire was designed to assess which of the generated items were considered as relevant for a PLD-specific questionnaire sensitive to detect changes in the occurrence of PLD associated symptoms. Each item was scored on an end-anchored rating scale of 1-9, where 1=not relevant and 9= highly relevant. Experts completed the questionnaires anonymously to prevent them from influencing each other's answers. The facilitator provides summarized answers after each round and the experts are asked to reconsider their answer in view of the general opinion. The second round contained only items where no consensus was reached in the first round. See Supplementary file 2 for a systematic overview of the Delphi Survey.

#### *1b) Item selection*

After the first round we calculated the median ratings of each item and we considered ratings of 1-3 as no or very low relevance, 4-6 as medium relevance, and 7-9 as high relevance for the questionnaire. Five levels of consensus were established: unanimous (100% of the clinicians have ratings in one of the three ranges 1-3, 4-6 or 7-9), strong (80- 99%); moderate (70-79%); weak consensus (60 – 69%) and no consensus (<60%). After the second round, we considered 80-100 % agreement as consensus. We selected items for the questionnaire if they were rated as relevant (mean score 7-9) and consensus was reached. Supplementary Figure 1 shows an overview of the item selection process.

**Supplementary File 2. Results of the pilot version of the English PLD-Q in a US cohort**

We identified 216 US patients that fitted our inclusion criteria. Of them, 54 patients were selected based on matching age and gender of the Dutch cohort. In total, 34 patients (91% female, 35% ADPLD) with a mean age of 57 years returned their questionnaire (response rate 63%). Mean score in the US cohort was  $45 \pm 20$  points (range 9-91). No total score could be calculated in 2 patients due to missing results. Missing results of the individual questionnaires ranged between 0 and 2.9%. There were no floor (0%) or ceiling effects (0%). The PLD-Q total score showed a positive correlation to the symptom scale of the EORTC QLQ-C30 of  $r=0.835$ ,  $P=0.002$  and a negative correlation to the global health status of the EQ-5D of  $0.544$ ,  $P=0.002$ . Score distributions were similar across the Dutch and US population, see Supplementary Figure 2.

Supplementary File 3. Final version of the PLD-Q

## Polycystic Liver Disease Questionnaire

### Instructions:

- This questionnaire consists of 16 paired questions investigating symptoms that you possibly may have.
- The questions relate to the past month
- Please try to answer all the questions
- For each question mark one box, see the example below:

Never      Seldom      Sometimes      Regularly      Often      Always

                            

---

**1a) How often did you experience fullness in your abdomen related to your polycystic liver?**

Never      Seldom      Sometimes      Regularly      Often      Always

                            

**1b) How much did this bother you?**

Not at all      A little      Somewhat      Quite a bit      A lot

                      

**2a) How often did you experience lack of appetite?**

Never      Seldom      Sometimes      Regularly      Often      Always

                            

**2b) How much did this bother you?**

Not at all      A little      Somewhat      Quite a bit      A lot

**3a) How often have you felt full quickly after beginning to eat?**

Never      Seldom      Sometimes      Regularly      Often      Always  
                             

**3b) How much did this bother you?**

Not at all      A little      Somewhat      Quite a bit      A lot  
                       

**4a) How often did you have acid reflux?**

Never      Seldom      Sometimes      Regularly      Often      Always  
                             

**4b) How much did this bother you?**

Not at all      A little      Somewhat      Quite a bit      A lot  
                       

**5a) How often did you experience nausea?**

Never      Seldom      Sometimes      Regularly      Often      Always  
                             

**5b) How much did this bother you?**

Not at all      A little      Somewhat      Quite a bit      A lot

**6a) How often did you feel pain or pressure in your rib cage?**

Never      Seldom      Sometimes      Regularly      Often      Always  
                             

**6b) How much did this bother you?**

Not at all      A little      Somewhat      Quite a bit      A lot  
                       

**7a) How often did you have pain in your side?**

Never      Seldom      Sometimes      Regularly      Often      Always  
                             

**7b) How much did this bother you?**

Not at all      A little      Somewhat      Quite a bit      A lot  
                       

**8a) How often did you have abdominal pain?**

Never      Seldom      Sometimes      Regularly      Often      Always  
                             

**8b) How much did this bother you?**

Not at all      A little      Somewhat      Quite a bit      A lot

**9a) How often did you have back pain?**

Never      Seldom      Sometimes      Regularly      Often      Always  
                             

**9b) How much did this bother you?**

Not at all      A little      Somewhat      Quite a bit      A lot  
                       

**10a) How often were you short of breath after physical exertion (for example climbing the stairs)?**

Never      Seldom      Sometimes      Regularly      Often      Always  
                             

**10b) How much did this bother you?**

Not at all      A little      Somewhat      Quite a bit      A lot  
                       

**11a) How often were you limited in your mobility?**

Never      Seldom      Sometimes      Regularly      Often      Always  
                             

**11b) How much did this bother you?**

Not at all      A little      Somewhat      Quite a bit      A lot

**12a) How often were you tired?**

Never      Seldom      Sometimes      Regularly      Often      Always  
                             

**12b) How much did this bother you?**

Not at all      A little      Somewhat      Quite a bit      A lot  
                       

**13a) How often were you fearful or anxious when you thought about the future?**

Never      Seldom      Sometimes      Regularly      Often      Always  
                             

**13b) How much did this bother you?**

Not at all      A little      Somewhat      Quite a bit      A lot  
                       

**14a) How often were you concerned that the size of your abdomen is getting larger?**

Never      Seldom      Sometimes      Regularly      Often      Always  
                             

**14b) How much did this bother you?**

Not at all      A little      Somewhat      Quite a bit      A lot

**15a) How often were you dissatisfied by the size of your abdomen?**

Never      Seldom      Sometimes      Regularly      Often      Always  
                             

**15b) How much did this bother you?**

Not at all      A little      Somewhat      Quite a bit      A lot  
                       

**16a) How often did your polycystic liver disease cause you to have a problem with intercourse?**

Never      Seldom      Sometimes      Regularly      Often      Always  
                             

**16b) How much did this bother you?**

Not at all      A little      Somewhat      Quite a bit      A lot
